# Supplementary material for: Synergistic effect of water-soluble species and relative humidity on morphological changes of aerosol particles in Beijing mega-city during severe pollution episodes
Source: Copernicus journal article supplement (doi:10.5194/acp-2018-623), 2018-08-02
Supplement: Supplementary file 1 [file acp-2018-623-supplement.pdf]

## Supplementary Figures

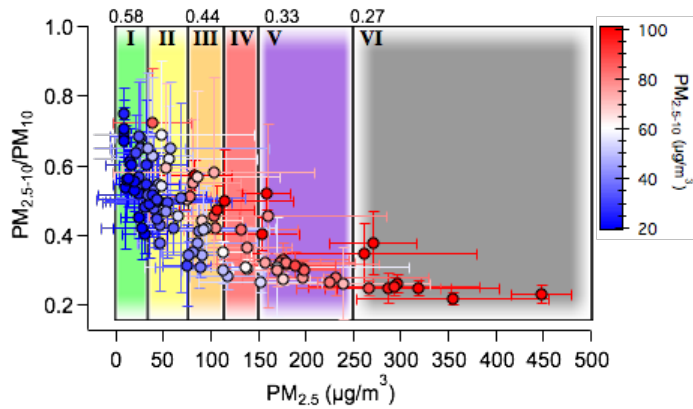

SF.1 The relationship between  $PM_{2.5-10}/PM_{10}$  as a function of mass concentration of  $PM_{2.5}$ . Colored-block behind the symbols indicate the air quality level classifications. Color filled circles indicated the daily averaged mass concentration of  $PM_{2.5}$ .

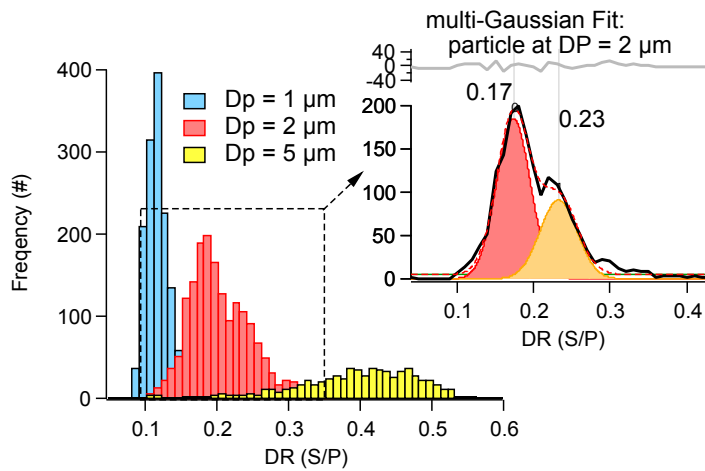

SF.2 Scatter plot of mass fraction of particle in coarse mode ( $PM_{2.5-10}$ ) in  $PM_{10}$  as a function of mass concentration of  $PM_{2.5}$ . The shaded colour represent the air quality level during observation period.
